# Supplementary material
Source: PubMed Central journal article supplement (PMC2876510)
Supplement: supp_30_11_2693__1.pdf [file supp_30_11_2693__1.pdf]

1 **SUPPLEMENTARY MATERIAL**

2

3 **Supplementary Figure 1. Validation of multiplex SNUPE assays for the *H19/Igf2***  
4 **region.**

5 A representative mixing experiment is shown. Fourteen control DNA samples were  
6 processed in replicates along with the CHIP samples. Sonicated 129 and CS genomic  
7 DNA were mixed in different % ratios (100:0, 95:5, 90:10, 80:20, 70:30, 60:40 and  
8 50:50, 40:60, 30:70, 20:80, 10:90, 5:95, 0:100) for the standard curves. 129 X CS DNA  
9 was used for skew correction. The components of the 7-plex and *H19* promoter assays,  
10 quantitating DNA alleles at the *H19/Igf2* imprinted domain (positions depicted  
11 graphically in Figure 1) are indicated at the right. Average measured ratios were plotted  
12 against the input ratios with standard deviations. The assays were rigorously quantitative  
13 using small amount, (25 ng) of total DNA.

14

15 **Supplementary Figure 2. Validation of the novel DMR 16-plex SNUPE assays.**

16 The 16 components of the multiplex assay, quantitating DNA alleles at 11 DMRs of  
17 interest, are indicated on the right. The components of the multiplex assay, the different  
18 DMRs are indicated at the right. Alternative SNPs are included for the *H19/Igf2* ICR, IG-  
19 DMR, *Peg1-Mest* and *Zac1* DMRs. Control 129 and JF1 genomic DNA were mixed in  
20 different % ratios. 129 X JF1 heterozygous DNA was used for skew correction..

21

22

23

1 **Supplementary Figure 3. Example for the Sequenom SNUPE assays.**

2 The *Zac1*#1 SNUPE assay is shown from the DMR multiplex reaction. (A) Standards.  
3 Sonicated 129 and JF1 genomic DNA were mixed in different % ratios. MALDI-TOF  
4 peaks of four data points (0:100, 100:0, 50:50 and 10:90) are shown to illustrate the  
5 accuracy of the allele-specific nucleotide incorporation (A versus G) into the unextended  
6 primer (UEP) on 129 and JF1 DNA as indicated. An asterisk indicates the peaks of the  
7 extended UEP *Pegl-Mest*#2 in the 16-plex assay. All of the data points from the full  
8 mass spectrum are plotted in Figure S2. (B) Measurement of allele-specific chromatin  
9 composition at the *Zac1* DMR. Parental alleles indicated on top in the reciprocal crosses.  
10 The H3K4me2 and H3K9me3 antibodies were used to precipitate 129 X JF1 and JF1 X  
11 129 MEF chromatin as marked below each chart. These measurements are shown in  
12 Figure 7C and 8B.

13

14 **Supplementary Figure 4. Validation of the H3K79 antibodies.**

15 Peptide immuno-dot blot assays are shown. A dilution series was blotted from each  
16 modified histone H3 peptide and probed with the specific antibodies indicated at the top.  
17 Each antibody specifically recognized its peptide but not any of the other peptides. H3  
18 peptides were the following: monomethyl -lysine 79 (ab4555), dimethyl-lysine 79 (07-  
19 366), trimethyl-lysine 79 (ab4557), trimethyl-lysine 9 (ab1773). Specific antibodies were  
20 the following: anti-monomethyl-Histone (Lys79) ab2886 (1:170 dilution), anti-dimethyl-  
21 Histone (Lys79) 07-366 (1:300 dilution), anti-trimethyl-Histone (Lys79) ab2621 (1:300  
22 dilution), anti-trimethyl-Histone (Lys9) 17-625 (1:300 dilution).

23

1 **Supplementary Figure 5. Validation of the 7-plex RNA SNUPE assays.**

2 The components of the 7-plex RNA assays are indicated at the right. SNPs were obtained  
3 between 129 and JF1 RNA for *Gtl2*, *H19*, *Igf2*, *Snrpn* and *Zac1* imprinted genes by DNA  
4 sequencing. Alternative SNPS (A and B) in the same transcript gave identical results.  
5 Allele-specific expression analysis was performed on the SEQUENOM allelotyping  
6 platform similar to multiplex ChIP-SNUPE assays. For quantitation controls, RNA was  
7 prepared from 13.5 dpc inbred 129S1 and JF1 embryos. 129 and JF1 RNAs were mixed  
8 in different ratios (100:0, 95:5, 90:10, 80:20, 70:30, 60:40 and 50:50, 40:60, 30:70, 20:80,  
9 10:90, 5:95, 0:100) and 200 ng of the mixes were used to prepare cDNA using  
10 Superscript III Random Primer Synthesis kit. 2  $\mu$ l of first strand cDNA was used for the  
11 sequenom reaction. The control mixing experiment is shown. 129 X JF1 DNA was used  
12 for skew correction. These fourteen control DNA samples were processed in replicates  
13 along with the experimental samples. Average measured ratios were plotted against the  
14 input ratios with standard deviations. The *Igf2* transcript quantitation required curve  
15 fitting. The assays were rigorously quantitative.

16

17

18

19

20

21

22

23

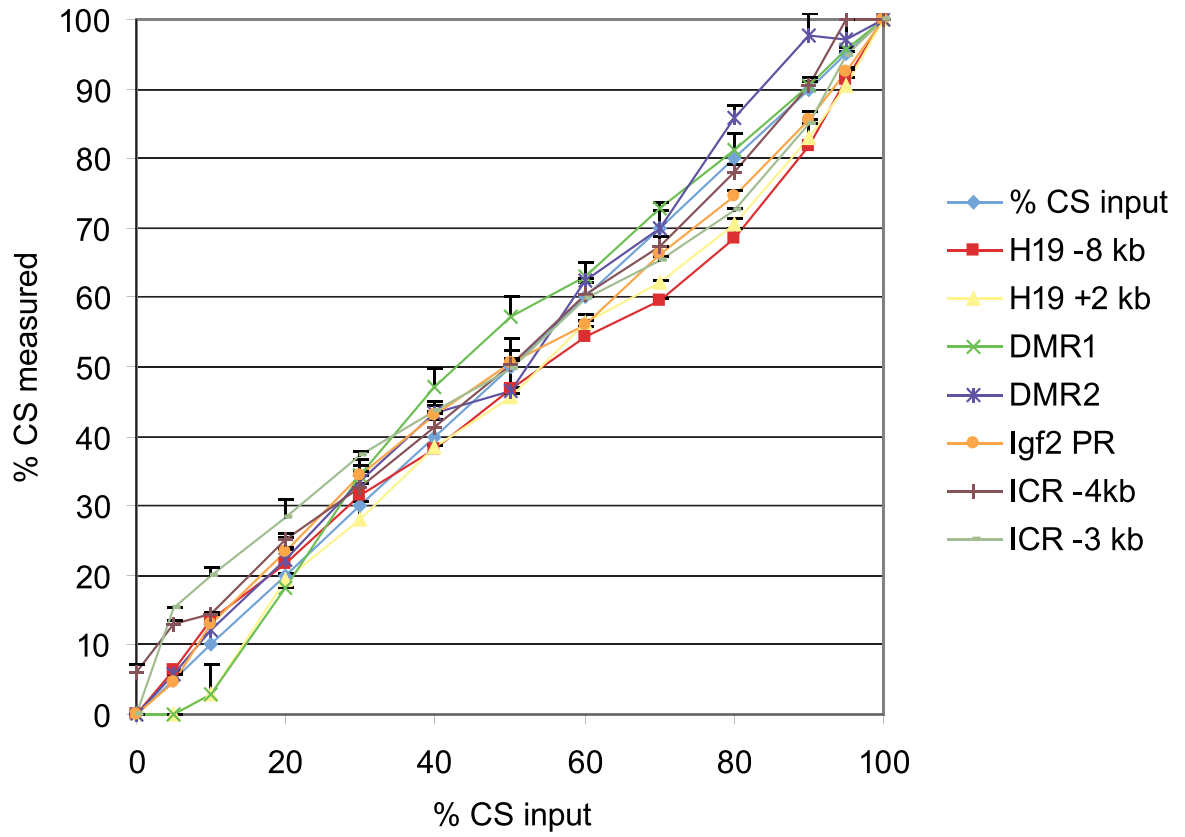

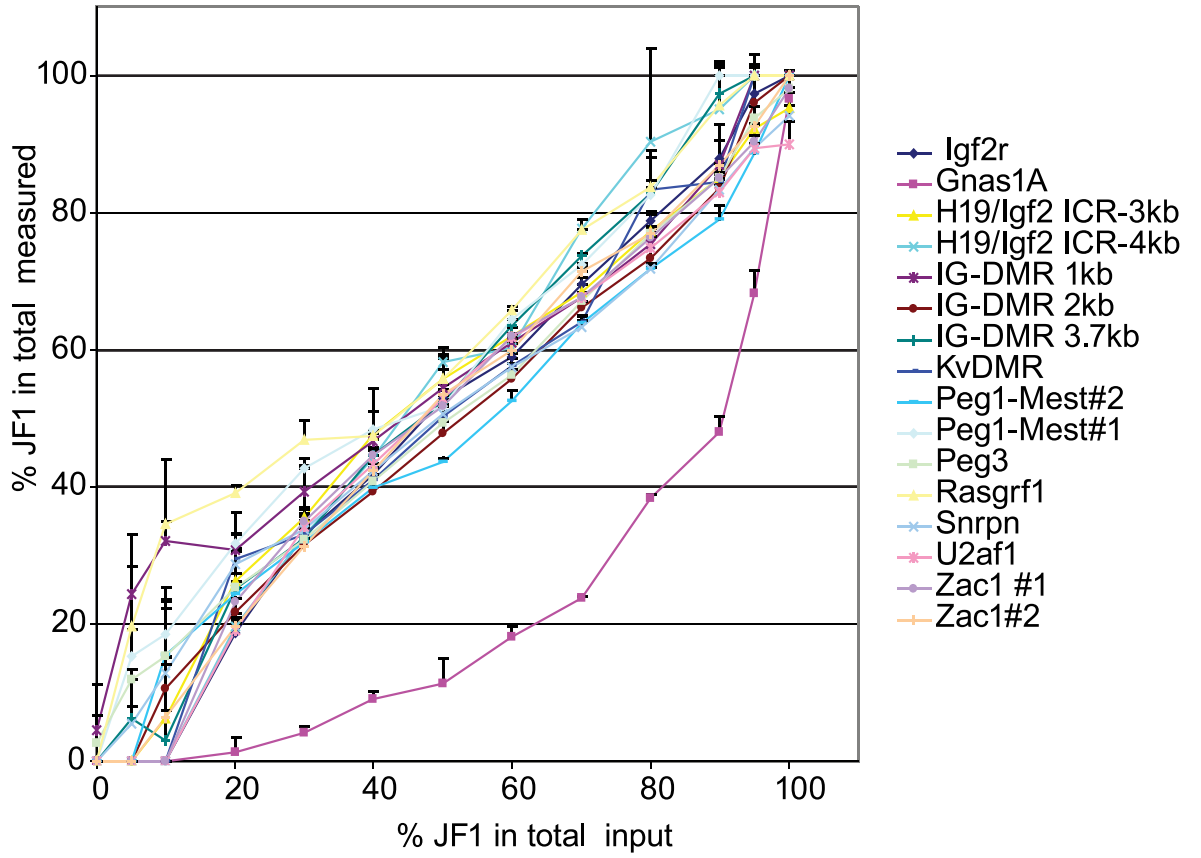

**A**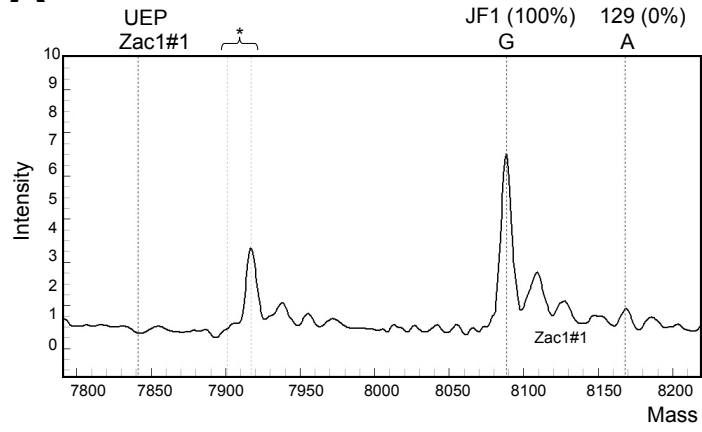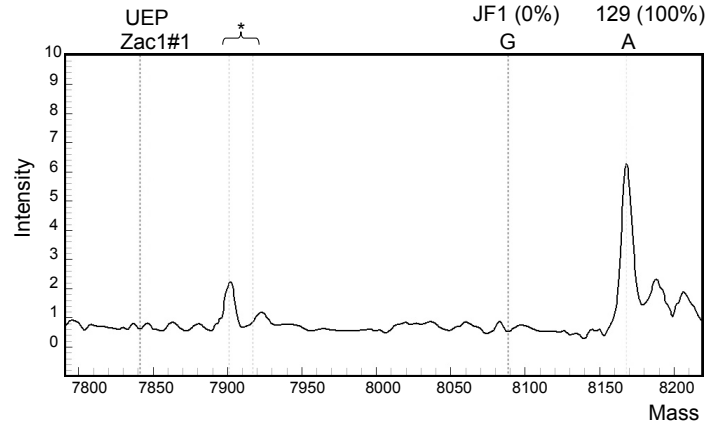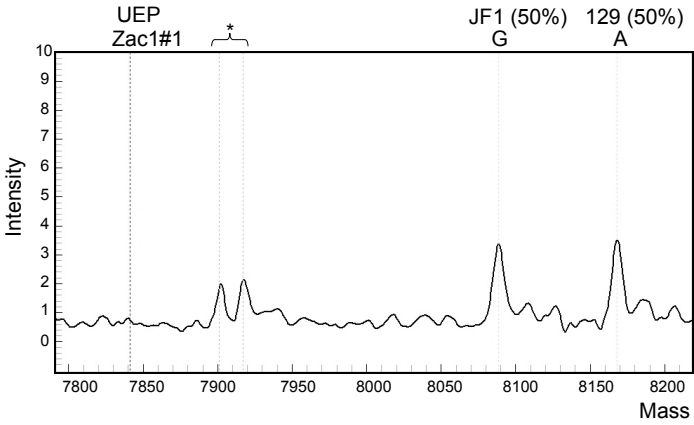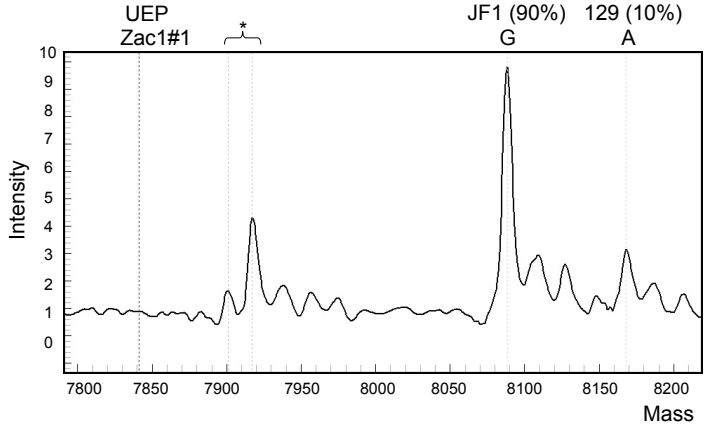**B**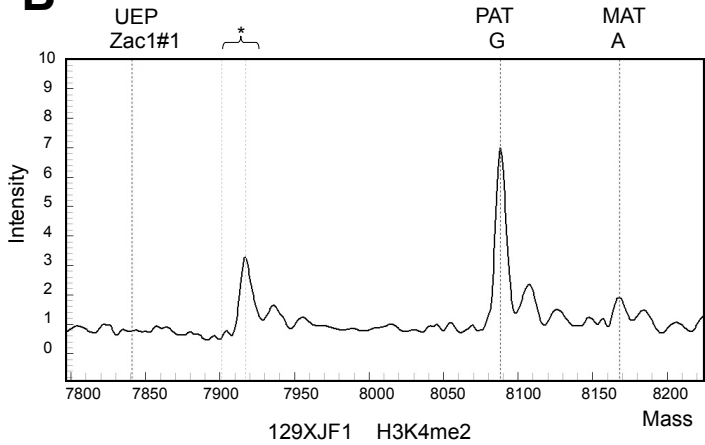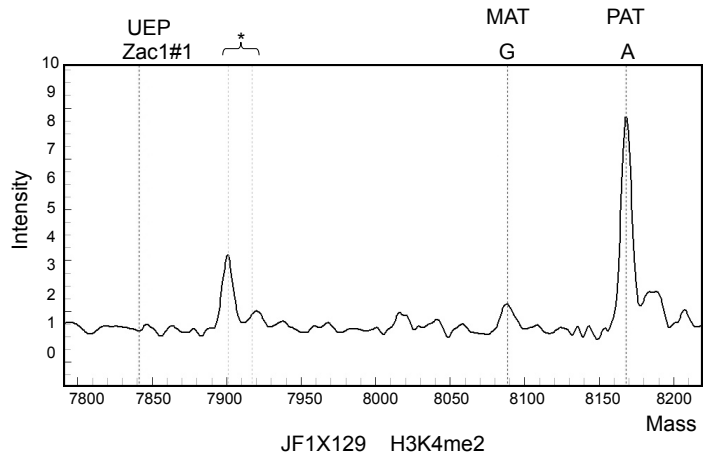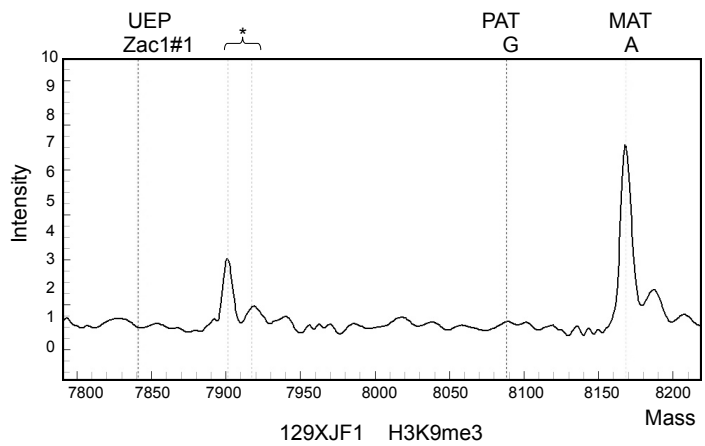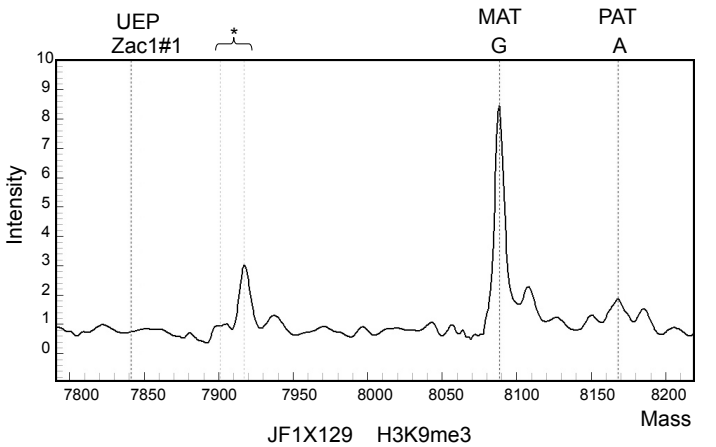

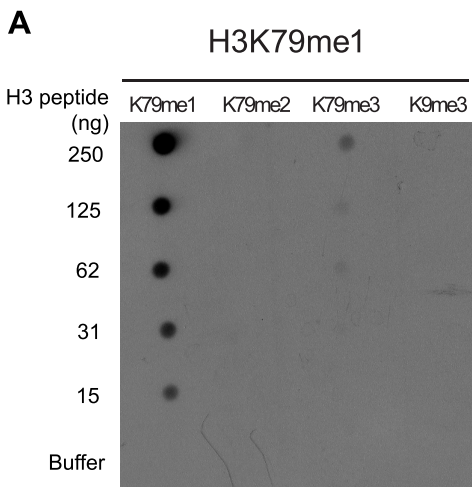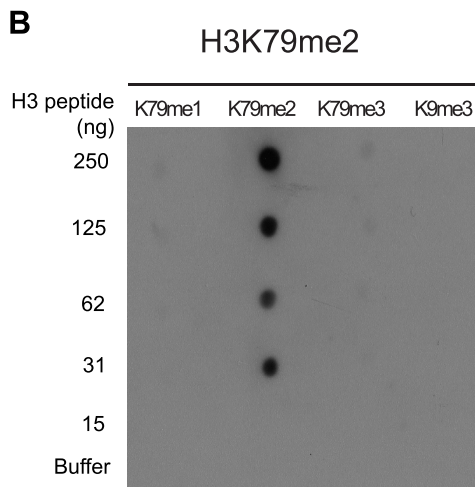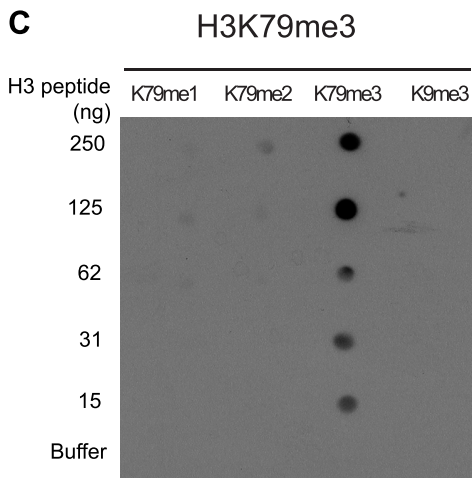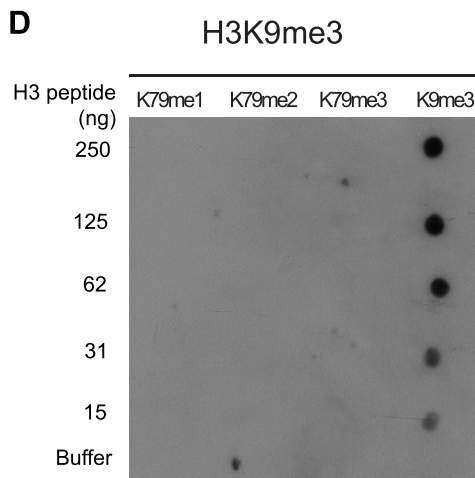

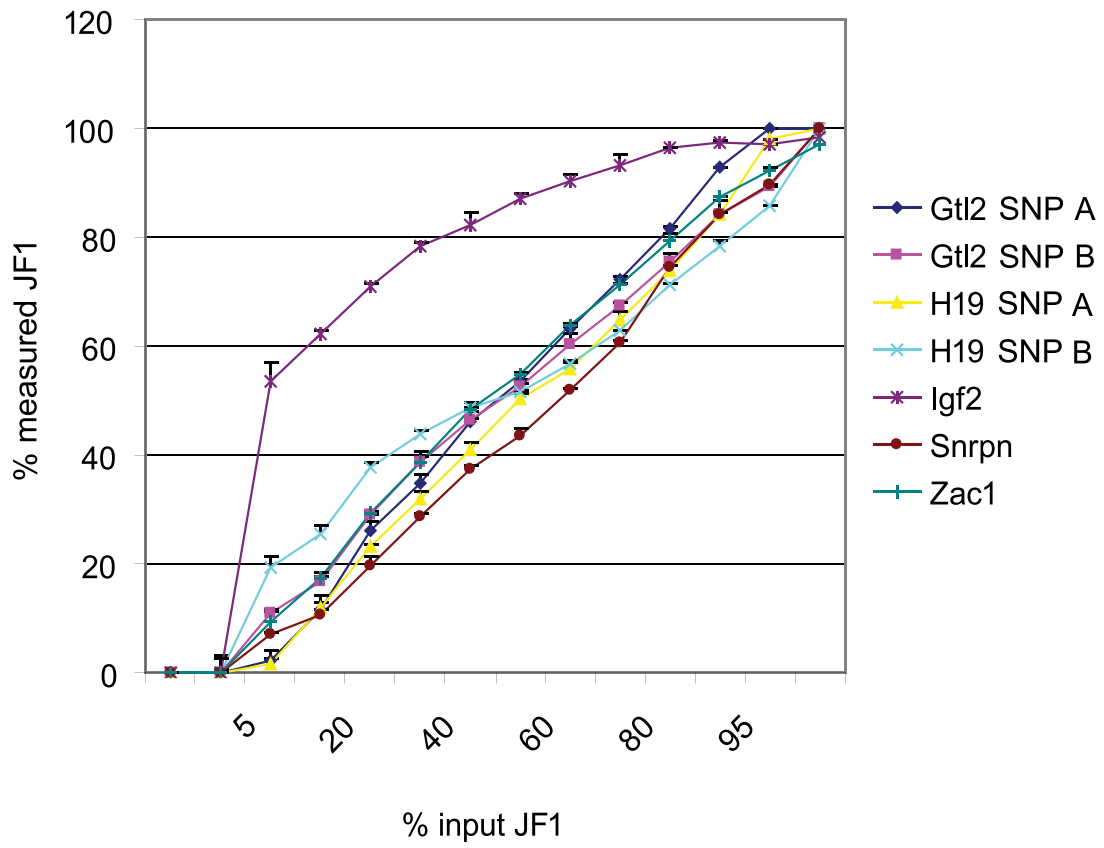



## Supplementary Table 1. Primer sequences

|                                                                                |                                       |                                       |                                 |                   |
|--------------------------------------------------------------------------------|---------------------------------------|---------------------------------------|---------------------------------|-------------------|
| <b>Sequenom-DMR 16-plex assay</b>                                              |                                       | Forward                               | Reverse                         | UEP               |
| SNUPE-Igf2r                                                                    | 5'-ACGTTGGATGGTCTGTGATCAGGGCCAAC-3'   | 5'-ACGTTGGATGTTGCCTCTCTTGAACGTG-3'    | 5'-GTGGCACTTTTGAGTTCATC-3'      |                   |
| SNUPE-Gnas1A                                                                   | 5'-ACGTTGGATGTTAATCTAGAGCCCGTGTG-3'   | 5'-ACGTTGGATGAACAGCCGAGAAGAAGACC-3'   | 5'-CACCTCTCCCACCTA-3'           |                   |
| SNUPE-H19/Igf2 ICR -3kb                                                        | 5'-ACGTTGGATGCGATTGCGCCAAACCTAAAG-3'  | 5'-ACGTTGGATGACCCACAGCATTGCCATTTG-3'  | 5'-cttaCATTGTGAATTTCCAATACC-3'  |                   |
| SNUPE-H19/Igf2 ICR -4kb                                                        | 5'-ACGTTGGATGTTTTCTAGGCTGGTACCTCG-3'  | 5'-ACGTTGGATGCTGTTTACACACAAAGG-3'     | 5'-cccaGACTCCCAAATCAACAAG-3'    |                   |
| SNUPE-IG-DMR 1kb                                                               | 5'-ACGTTGGATGGGATGGTAGATAGATAACCTG-3' | 5'-ACGTTGGATGCCCGTGATTACCACAATTC-3'   | 5'-TGTCTGAGAACAAGAGC-3'         |                   |
| SNUPE-IG-DMR 2kb                                                               | 5'-ACGTTGGATGCAATGGAGAATGCCTTGAGC-3'  | 5'-ACGTTGGATGTTACTCGCGTGATCCCATT-3'   | 5'-gtcgGTGAGAATGTTTTAGCCAT-3'   |                   |
| SNUPE-IG-DMR2 3.7kb                                                            | 5'-ACGTTGGATGGGGTAATTGGCAACCATAGG-3'  | 5'-ACGTTGGATGATGAGTCGGTGTGAAGTAAC-3'  | 5'-cTGCCATTTACTGCAGCC-3'        |                   |
| SNUPE-KvDMR                                                                    | 5'-ACGTTGGATGCTCAGTTCCTGATTTTGGC-3'   | 5'-ACGTTGGATGCAAGGGCCTCAAGACCAC-3'    | 5'-gCGTATTTTGCCTCCACG-3'        |                   |
| SNUPE-Peg1-Mest#1                                                              | 5'-ACGTTGGATGAACAACAAAAGACCCCC-3'     | 5'-ACGTTGGATGCCACTAACGGGTTTTAAGGC-3'  | 5'-gaaaaCTAATGCTTTTGTCTTTCAA-3' |                   |
| SNUPE-Peg1-Mest#2                                                              | 5'-ACGTTGGATGAGAGCTGGTCAATTGTTGG-3'   | 5'-ACGTTGGATGTGTGACAATCTCAGCTCCTG-3'  | 5'-gaTGAATTCCTAAATCACATGC-3'    |                   |
| SNUPE-Peg3                                                                     | 5'-ACGTTGGATGATCCTTAGCGTACCACCTG-3'   | 5'-ACGTTGGATGCCAGTCTGCATCATTCAAG-3'   | 5'-GGCGGTGTCTGAAGTA-3'          |                   |
| SNUPE-Rasgrf1                                                                  | 5'-ACGTTGGATGATCCGTGGCTACCCTATTG-3'   | 5'-ACGTTGGATGGTAGCGCAACAGTGAAGTG-3'   | 5'-ggagGTGCGGCAGCCATAGC-3'      |                   |
| SNUPE-Snrpn                                                                    | 5'-ACGTTGGATGTGCTTTTGGCAGGACATTC-3'   | 5'-ACGTTGGATGCACATGCGCACATTTTGGCC-3'  | 5'-CAGGACATTCGGGTCA-3'          |                   |
| SNUPE-U2af1                                                                    | 5'-ACGTTGGATGGGCTTCCCATGTTGTTTCC-3'   | 5'-ACGTTGGATGGTACTCTTATGTGTTCTTTG-3'  | 5'-aatcACTTTACATTGTGATGCTTT-3'  |                   |
| SNUPE-Zac1#1                                                                   | 5'-ACGTTGGATGCCTGAGCCATGTTCCAGGAT-3'  | 5'-ACGTTGGATGATTTGGGCTTCTCCCTTTC-3'   | 5'-ATATACTGATGATGGGGTGGGGTAA-3' |                   |
| SNUPE-Zac1#2                                                                   | 5'-ACGTTGGATGCATATGCACCAGAGAACAGG-3'  | 5'-ACGTTGGATGTTATGTTCCAGTCAGGCG-3'    | 5'-actcCACAGTAAGGCCTGTT-3'      |                   |
| <b>Sequenom-H19 7 plex</b>                                                     |                                       | Forward                               | Reverse                         | UEP               |
| SNUPE-H19-4kb                                                                  | 5'-ACGTTGGATGTTGCGCCAACCTAAAGAGC-3'   | 5'-ACGTTGGATGAGGTACTGAACTTGGGTGAC-3'  | 5'-CATTGTGAATTCCAATACC-3'       |                   |
| SNUPE-H19-3kb                                                                  | 5'-ACGTTGGATGACACTTGTGTTTCTGGAGGG-3'  | 5'-ACGTTGGATGATGCCTTCCATATAGTGAGCC-3' | 5'-aaGGGTCCCTTTGGTC-3'          |                   |
| SNUPE-H19+8                                                                    | 5'-ACGTTGGATGCCCTAAGAACCTTCTTACC-3'   | 5'-ACGTTGGATGTTGCATCATAGGACCACCAC-3'  | 5'-taTTCACCTTCTCGGT-3'          |                   |
| SNUPE-H19+2                                                                    | 5'-ACGTTGGATGGCTTTGAGTCTCTCCGTATG-3'  | 5'-ACGTTGGATGATGGACGACAGGTGGGTACT-3'  | 5'-ATGTATACAGCAGAGTGTG-3'       |                   |
| SNUPE-Igf2-PR2                                                                 | 5'-ACGTTGGATGAGCCGATCCAGGGGACTGT-3'   | 5'-ACGTTGGATGCTGAGTTAAGGCGCAGGTAG-3'  | 5'-CAGGGACCTACTTGC-3'           |                   |
| SNUPE-Igf2-DMR2                                                                | 5'-ACGTTGGATGACATCAGGCTGTTCCCTTG-3'   | 5'-ACGTTGGATGGGGTGTGTTAGAGCCAATCA-3'  | 5'-CCAATCAAATTTGGTTTTTAGAA-3'   |                   |
| SNUPE-Igf2-DMR1                                                                | 5'-ACGTTGGATGAAGAACACATGCATACCCTG-3'  | 5'-ACGTTGGATGATAGAAAACGCTGAGGTGAC-3'  | 5'-CACCTTAAGGTGTCCA-3'          |                   |
| <b>Sequenom-H19 Pr Singleplex</b>                                              |                                       | Forward                               | Reverse                         | UEP               |
| H19-Promoter                                                                   | 5'-TTTGGAGAATTCAGGACGGGTGCG-3'        | 5'-ACCCACGACTCTCCTCCAGCTCTC-3'        | 5'-TCTTCCCAGTTTCCCC-3'          |                   |
| <b>Real time-Exon specific primers for expression analysis (cDNA template)</b> |                                       | Probe Sequence                        | Sense Primer                    | Anti-sense Primer |
| Peg3 exon 3-4 HEX                                                              | CGCTCCAGGTCTCGCTCACTGCCA              | TCACGAAGACGACACCAACAG                 | GGCTCCACATCTCTGCTTCTG           |                   |
| Dot1L exons 5-7 FAM                                                            | CCGCAGCAACCTGAAGGACAACCTG             | CCCTTCTCCCTGAGGTGATG                  | TCCGCTTCTCCACTCCGTAG            |                   |
| Zac1 exon1 TEX                                                                 | CGCCAGGAGATGCCCGCTTGC                 | GGCTTCCCAACCTCACTCG                   | GCAGCCTAAGCAGCCATGAC            |                   |
| Dlk1 exons 2-3 TAMRA                                                           | CGTCCCTTGTCTCCTGCTGGCTT               | GGCCGCGCCAGATGATC                     | ACAGGGTGGCTCGCATTGAC            |                   |
| Rtl1 exon TEX                                                                  | ACCGTTGAAGAGACACCAGGCAGCA             | GTCTCCGAGGGCTCATCC                    | GCCTCCACTGGGTCTCC               |                   |
| Gtl2 exon 1 HEX                                                                | TCCTGCGTGTCTCTTCTGCCTCCAT             | CCCTGAAAGGGGCTGATTGG                  | GATTAActCAGAGCGGGTCTCC          |                   |
| Snrpn exon 6-7 TEX                                                             | CATTGCTCGTGTGCCTCTTGTCTGG             | GGCCACCTCCTAAAGATACTG                 | ACCTGTGGCACTCCTCTG              |                   |
| Igf2 exon 2-3 HEX                                                              | CCTTCAAGCCGTGCCAACCGTCCG              | GGACCGGGCTTCTACTTC                    | AGCAGCACTCTCCACGATG             |                   |
| H19 exon 4-5 FAM                                                               | TGCCTCAGGAATCTGCTCCAAGGTG             | CTGAATCAAGAAAGATGCTGCAATC             | GGTGTATGAGTCTGCTCTTTC           |                   |
| Gapdh exon 5-6 Cy5                                                             | CGTGCCCGCTGGAGAAACCTGCC               | AATGTGTCCTGCTGGATCTG                  | CAACCTGGTCTCAGTGTAGC            |                   |
| <b>Sequenom-allele specific expression for shRNA</b>                           |                                       | Forward                               | Reverse                         | UEP               |
| SNP_ID                                                                         | Forward                               | Reverse                               | UEP                             |                   |
| Igf2                                                                           | ACGTTGGATGACATCAGGCTGTTCCCTTG         | ACGTTGGATGGGGTGTGTTAGAGCCAATCA        | TTGCCCCACACCATC                 |                   |
| H19 SNP A                                                                      | ACGTTGGATGGCTTGTGAGAGACTCAAAGCAC      | ACGTTGGATGCCAGTGCAATCGACTTAGTG        | CTCTGTTTCCCCATTTAC              |                   |
| H19 SNP B                                                                      | ACGTTGGATGTTGCCCTCAGACGGAGATG         | ACGTTGGATGGCTTTGAGTCTCTCCGTATG        | AGCATTGCCAAAGAGG                |                   |
| SNRPN                                                                          | ACGTTGGATGCACAGATATGACATTTGCTC        | ACGTTGGATGAGTGAATGTCAGAAATCAGG        | GACATTTGCTCAAGCTAG              |                   |
| GTL2 SNP A                                                                     | ACGTTGGATGAGGCTGTTGTCTTCACTG          | ACGTTGGATGCTGTGAGGTAGGAACCTGAG        | CACGTGTTGAGTCTACATCT            |                   |
| GTL2 SNP B                                                                     | ACGTTGGATGGAATTTATTGAAAGCACC          | ACGTTGGATGCAGCCGAATGTGCTTAGAA         | AGCACCATGAGCCAC                 |                   |
| ZAC1                                                                           | ACGTTGGATGAAGCCAGACAGAAAGAGG          | ACGTTGGATGGCTATTGTCTCTGGATCTC         | CAGCCTGACTCCAGAAA               |                   |
| <b>DMRs- Real time</b>                                                         |                                       | Probe sequence                        | Sense Primer                    | Anti-sense Primer |
| Peg1-Mest DMR-TET                                                              | CCTGCCATTGTGAGTCCAGAACCCTG            | CAGGAGCTGAGATTGTCACAGAG               | GCACGATCTAGTCGCACCTATG          |                   |
| Zac1 DMR-Cy5                                                                   | CGACGCCCTCATGTCCGCTGACTG              | CCTTACTGTGTAGTACCACAAAGC              | AACTGGCTTATTTGCTCCTATACTG       |                   |
| Gnas1A DMR-FAM                                                                 | TGCTGCCTGCTTCTTATCCGTGG               | GGCTCTTCTTCGGCTGTTG                   | GGTTCCGATCTCCTCACAAAGTAG        |                   |
| Peg3 DMR-TAMRA                                                                 | TTCTGAATGAGAGAGACCACCCCTTTG           | ATCTTGAATGATCGAGGACTGG                | GTCAGAAAGATGGCGTCAG             |                   |
| Snrpn promoter DMR-TAMRA                                                       | CATGCGTCCCAGGCAATGGCTGC               | TCCTTTTGGTAGCTGCCCTTTGG               | CCGCAATGGCTCAGGTTTGTG           |                   |
| KvDMR1 -TEX                                                                    | CGCCAGTGGCTCCGATTCCTG                 | CGGCTGGCTCCATCTTC                     | CGACCTCGGGCTCAAAG               |                   |
| Igf2r DMR2-TAMRA                                                               | AAACCCTGCCCTTCCCTCCGTCTCC             | CAAGAGGCCAAGCTCAAAGATG                | CCTCATGCATAGCCAGGATAGC          |                   |
| U2af1 DMR-TEX                                                                  | AGAACACATAAGAGTACAGAACTAATGCTCCTTG    | ATTAACATCGTTTTATATGTCTGAATCTG         | CAGCCAGGATACATAGTGAGAG          |                   |
| H19-Igf2 ICR-FAM                                                               | ACATTACACAGGACTCCAGGAGGC              | CACTTACACCCAGGACTCAAAGG               | CGGTATAAACCACAACTGATTC          |                   |
| Rasgrf1 DMR-Cy5                                                                | CGTGGCTACCCTATTGCTGTTGC               | GCTGCTGCTCCACATCC                     | GGTAGCGCAAGTGAAGTG              |                   |
| IG-DMR-TET                                                                     | CGGCACAATTCACGGCGGTTCCG               | CGTGTACTAATGCCGCTTCCG                 | GCTACTCCACGGCGAACC              |                   |
| <b>Control regions-Real time PCR</b>                                           |                                       | Probe sequence                        | Sense Primer                    | Anti-sense Primer |
| c-myc promoter-Cy5                                                             | CTGCCTCGCTCCACACAATACGCCA             | AGATAACTCATTGCTTCTGCTCCTTCC           | TGTGTTCTGCCCTGCGTATATC          |                   |
| IAPLTR2b-TET                                                                   | CGGTTTGTGCTTCTTCTGCTGCG               | TCTGAAAGATGTAAGCAATAAAGC              | TCTTACACGGGTCTCGAC              |                   |
| Maj satellite                                                                  | Sybr                                  | GACGACTTGAATAAGTACGAAATC              | CATATTCAGGCTCCTTCAAGTGTGC       |                   |
